# Supplementary material
Source: PubMed Central journal article supplement (PMC7988425)
Supplement: jama-e213224-s003.pdf [file jama-e213224-s003.pdf]

## Supplementary Online Content 3

Rubino D, Abrahamsson N, Davies M, et al. Effect of Continued Weekly Subcutaneous Semaglutide vs Placebo on Weight Loss Maintenance in Adults with Overweight or Obesity: The STEP 4 Randomized Clinical Trial. *JAMA*. 2021. doi:10.1001/jama.2021.3224.

### Statistical Analysis Plan

*Note: The secondary estimand (described herein) is referred to as the trial product estimand (also known as the hypothetical estimand) in the manuscript.*

Statistical Analysis Plan  
Trial ID: NN9536-4376  
UTN: U1111-1201-0898  
EudraCT No.: 2017-003473-34

~~CONFIDENTIAL~~

Date:  
Version:  
Status:  
Page:

31 March 2020 | **Novo Nordisk**  
1.0  
Final  
1 of 24

## Statistical Analysis Plan

**Trial ID: NN9536-4376**

### STEP 4

# **Effect and safety of semaglutide 2.4 mg once-weekly in subjects with overweight or obesity who have reached target dose during run-in period**

Author

[REDACTED]  
*Biostatistics Obesity*

~~This confidential document is the property of Novo Nordisk. No unpublished information contained herein may be disclosed without prior written approval from Novo Nordisk. Access to this document must be restricted to relevant parties.~~

Statistical Analysis Plan  
 Trial ID: NN9536-4376  
 UTN: U1111-1201-0898  
 EudraCT No.: 2017-003473-34

~~CONFIDENTIAL~~

Date: 31 March 2020  
 Version: 1.0  
 Status: Final  
 Page: 2 of 24

**Novo Nordisk**

## Table of contents Page

|                                                                            |           |
|----------------------------------------------------------------------------|-----------|
| <b>Table of contents</b> .....                                             | <b>2</b>  |
| <b>List of abbreviations</b> .....                                         | <b>3</b>  |
| <b>1 Introduction</b> .....                                                | <b>5</b>  |
| 1.1 Trial information .....                                                | 5         |
| 1.1.1 Objective(s) .....                                                   | 5         |
| 1.1.1.1 Primary objective .....                                            | 5         |
| 1.1.1.2 Secondary objectives .....                                         | 5         |
| 1.1.2 Estimands .....                                                      | 5         |
| 1.1.3 Endpoints .....                                                      | 6         |
| 1.1.3.1 Primary endpoint .....                                             | 6         |
| 1.1.3.2 Secondary endpoints .....                                          | 7         |
| 1.1.4 Type of trial .....                                                  | 8         |
| 1.2 Scope of the statistical analysis plan .....                           | 8         |
| <b>2 Statistical considerations</b> .....                                  | <b>9</b>  |
| 2.1 Sample size determination .....                                        | 9         |
| 2.2 Definition of analysis sets .....                                      | 11        |
| 2.3 Statistical analyses .....                                             | 12        |
| 2.3.1 Primary endpoint .....                                               | 12        |
| 2.3.2 Secondary endpoints .....                                            | 17        |
| 2.3.2.1 Confirmatory secondary endpoints .....                             | 17        |
| 2.3.2.2 Supportive secondary endpoints .....                               | 18        |
| 2.3.3 Exploratory endpoints .....                                          | 22        |
| 2.3.4 Other analyses .....                                                 | 22        |
| 2.4 Pharmacokinetic and/or pharmacodynamic modelling .....                 | 22        |
| <b>3 Changes to the statistical analyses planned in the protocol</b> ..... | <b>23</b> |
| 3.1 Trial specific changes .....                                           | 23        |
| 3.2 Changes applied across STEP trials .....                               | 23        |
| <b>4 References</b> .....                                                  | <b>24</b> |

## List of abbreviations

|                         |                                                                  |
|-------------------------|------------------------------------------------------------------|
| <i>AD</i>               | <i>available but discontinued</i>                                |
| <i>ANCOVA</i>           | <i>analysis of covariance</i>                                    |
| <i>AT</i>               | <i>available on randomised treatment</i>                         |
| <i>BMI</i>              | <i>body mass index</i>                                           |
| <i>BP</i>               | <i>bodily pain</i>                                               |
| <i>CI</i>               | <i>confidence interval</i>                                       |
| <i>dBp</i>              | <i>diastolic blood pressure</i>                                  |
| <i>ECG</i>              | <i>electrocardiogram</i>                                         |
| <i>FAS</i>              | <i>full analysis set</i>                                         |
| <i>FFA</i>              | <i>free fatty acid</i>                                           |
| <i>FPG</i>              | <i>fasting plasma glucose</i>                                    |
| <i>GH</i>               | <i>general health</i>                                            |
| <i>HbA<sub>1c</sub></i> | <i>glycated haemoglobin</i>                                      |
| <i>HDL</i>              | <i>high density lipoprotein</i>                                  |
| <i>LAO-OT</i>           | <i>last available observation during the on-treatment period</i> |
| <i>LDL</i>              | <i>low-density lipoprotein</i>                                   |
| <i>MCS</i>              | <i>mental component summary</i>                                  |
| <i>MD</i>               | <i>missing and discontinued</i>                                  |
| <i>MedDRA</i>           | <i>Medical Dictionary for Regulatory Activities</i>              |
| <i>MH</i>               | <i>mental health</i>                                             |
| <i>MMRM</i>             | <i>mixed model for repeated measurements</i>                     |
| <i>MT</i>               | <i>missing on randomised treatment</i>                           |
| <i>PCS</i>              | <i>physical component summary</i>                                |
| <i>PF</i>               | <i>physical functioning</i>                                      |
| <i>PYE</i>              | <i>patient years of exposure</i>                                 |
| <i>PYO</i>              | <i>patient years of observation</i>                              |
| <i>RE</i>               | <i>role-emotional</i>                                            |
| <i>RP</i>               | <i>role-physical</i>                                             |
| <i>SAE</i>              | <i>serious adverse event</i>                                     |
| <i>SAP</i>              | <i>statistical analysis plan</i>                                 |
| <i>SAS</i>              | <i>safety analysis set</i>                                       |
| <i>sBP</i>              | <i>systolic blood pressure</i>                                   |
| <i>s.c.</i>             | <i>subcutaneous</i>                                              |
| <i>SD</i>               | <i>standard deviation</i>                                        |
| <i>SF</i>               | <i>social functioning</i>                                        |
| <i>SF-36</i>            | <i>Short Form-36</i>                                             |
| <i>TEAE</i>             | <i>treatment-emergent adverse event</i>                          |
| <i>VLDL</i>             | <i>very low density lipoprotein</i>                              |

Statistical Analysis Plan  
Trial ID: NN9536-4376  
UTN: U1111-1201-0898  
EudraCT No.: 2017-003473-34

~~CONFIDENTIAL~~

Date:  
Version:  
Status:  
Page:

31 March 2020 | **Novo Nordisk**  
1.0  
Final  
4 of 24

*VT*

*vitality*

*WC*

*waist circumference*

*WRSSM*

*Weight Related Sign and Symptom Measure*

Statistical Analysis Plan  
Trial ID: NN9536-4376  
UTN: U1111-1201-0898  
EudraCT No.: 2017-003473-34

CONFIDENTIAL

Date: 31 March 2020  
Version: 1.0  
Status: Final  
Page: 5 of 24

Novo Nordisk

# 1 Introduction

## 1.1 Trial information

### 1.1.1 Objective(s)

#### 1.1.1.1 Primary objective

*Effect-related: randomisation (week 20) to week 68*

To compare the effect of semaglutide s.c. 2.4 mg once-weekly versus semaglutide placebo as an adjunct to reduced-calorie diet and increased physical activity in subjects with overweight or obesity who have reached target dose of semaglutide during the run-in period, on body weight.

#### 1.1.1.2 Secondary objectives

*Effect-related: randomisation (week 20) to week 68*

To compare the effect of semaglutide s.c. 2.4 mg once-weekly versus semaglutide placebo as an adjunct to reduced-calorie diet and increased physical activity in subjects with overweight or obesity who have reached target dose of semaglutide during the run-in period, on

- cardiovascular risk factors
- clinical outcome assessments
- glucose metabolism

*Effect-related: week 0 to week 68*

To investigate the effect of semaglutide s.c. 2.4 mg once-weekly as an adjunct to reduced-calorie diet and increased physical activity in subjects with overweight or obesity who have reached target dose during the run-in period, on body weight.

*Safety and tolerability: week 0 to randomisation (week 20)*

To investigate the safety and tolerability of semaglutide s.c. 2.4 mg once-weekly as an adjunct to reduced-calorie diet and increased physical activity in subjects with overweight or obesity during the run-in period.

*Safety and tolerability: randomisation (week 20) to week 75*

To compare the safety and tolerability of semaglutide s.c. 2.4 mg once-weekly versus semaglutide placebo as an adjunct to reduced-calorie diet and increased physical activity in subjects with overweight or obesity who have reached target dose of semaglutide during the run-in period.

### 1.1.2 Estimands

#### Primary estimand

The estimand will quantify the average treatment effect of semaglutide relative to semaglutide placebo after 48 weeks' treatment with semaglutide at the target dose, as an adjunct to reduced-calorie diet and increased physical activity, in all randomised subjects regardless of adherence to

Statistical Analysis Plan  
 Trial ID: NN9536-4376  
 UTN: U1111-1201-0898  
 EudraCT No.: 2017-003473-34

~~CONFIDENTIAL~~

Date: 31 March 2020  
 Version: 1.0  
 Status: Final  
 Page: 6 of 24

**Novo Nordisk**

treatment provided that the subjects are able to reach the target dose of semaglutide during 20 weeks run-in with escalating semaglutide doses and regardless of initiation of other anti-obesity therapies (i.e. weight management drugs or bariatric surgery) ("treatment policy" estimand).

The primary estimand will cover all effect-related objectives except the secondary objective addressing 'Effect-related: week 0 to week 68'.

### **Secondary estimand**

The estimand will quantify the average treatment effect of semaglutide relative to semaglutide placebo after 48 weeks' treatment with semaglutide at the target dose, as an adjunct to reduced-calorie diet and increased physical activity, in all randomised subjects had they remained on their randomised treatment for the entire 48 weeks after reaching the target dose of semaglutide during the 20 weeks run-in with escalating semaglutide doses and not initiated other anti-obesity therapies (i.e. weight management drugs or bariatric surgery) ("hypothetical" estimand).

The secondary estimand will cover all effect-related objectives except the secondary objective addressing 'Effect-related: week 0 to week 68'.

### **Tertiary estimand**

The estimand will quantify the average treatment effect of semaglutide after 68 weeks, as an adjunct to reduced-calorie diet and increased physical activity, in all randomised subjects regardless of adherence to treatment and regardless of initiation of other anti-obesity therapies (i.e. weight management drugs or bariatric surgery) ("treatment policy" estimand).

The tertiary estimand will cover the secondary objective addressing 'Effect-related: week 0 to week 68'.

### **Quarternary estimand**

The estimand will quantify the average treatment effect of semaglutide after 68 weeks, as an adjunct to reduced-calorie diet and increased physical activity, in all randomised subjects had they remained on their randomised treatment for the entire 68 weeks and not initiated other anti-obesity therapies (i.e. weight management drugs or bariatric surgery) ("hypothetical" estimand).

The quarternary estimand will cover the secondary objective addressing 'Effect-related: week 0 to week 68'.

## **1.1.3 Endpoints**

### **1.1.3.1 Primary endpoint**

Change from randomisation (week 20) to week 68 in body weight (%)

Statistical Analysis Plan  
 Trial ID: NN9536-4376  
 UTN: U1111-1201-0898  
 EudraCT No.: 2017-003473-34

CONFIDENTIAL

Date:  
 Version:  
 Status:  
 Page:

31 March 2020 | **Novo Nordisk**  
 1.0  
 Final  
 7 of 24

### 1.1.3.2 Secondary endpoints

#### Confirmatory secondary endpoints

*Effect endpoints from randomisation (week 20) to week 68*

Change in:

- Waist circumference (cm)
- Systolic blood pressure (mmHg)
- Physical functioning score (SF-36)

#### Supportive secondary endpoints

*Effect endpoints from randomisation (week 20) to week 68*

Change in:

- Body weight (kg)
- BMI (kg/m<sup>2</sup>)
- Haemoglobin A1c (HbA1c) (% , mmol/mol)
- Fasting plasma glucose (FPG) (mg/dL)
- Fasting serum insulin (mIU/L)
- Diastolic blood pressure (mmHg)
- Lipids (mg/dL)
  - Total cholesterol
  - High-density lipoproteins (HDL)
  - Low-density lipoproteins (LDL)
  - Very low-density lipoproteins (VLDL)
  - Free fatty acids
  - Triglycerides
- SF-36:
  - Role-Physical score
  - Bodily Pain score
  - General Health score
  - Vitality score
  - Social Functioning score
  - Role-Emotional score
  - Mental Health score
  - Physical component summary
  - Mental component summary

Subjects who achieve (yes/no):

- Responder definition value for SF-36 physical functioning score

Subjects who gain weight (yes/no)



Statistical Analysis Plan  
 Trial ID: NN9536-4376  
 UTN: U1111-1201-0898  
 EudraCT No.: 2017-003473-34

CONFIDENTIAL

Date:  
 Version:  
 Status:  
 Page:

31 March 2020  
 1.0  
 Final  
 8 of 24

**Novo Nordisk**

### *Effect endpoints from week 0 to week 68*

Change in body weight (%)

Subjects who achieve (yes/no):

- Body weight reduction < 0%
- Body weight reduction  $\geq$  5%
- Body weight reduction  $\geq$  10%
- Body weight reduction  $\geq$  15%
- Body weight reduction  $\geq$  20%

### *Safety endpoints from week 0 to randomisation (week 20)*

Number of treatment-emergent AEs

Number of serious adverse events (SAEs)

Change in:

- Pulse (bpm)
- Amylase (U/L)
- Lipase (U/L)
- Calcitonin (ng/L)

### *Safety endpoints from randomisation (week 20) to week 75*

Number of treatment-emergent AEs

Number of SAEs

### *Safety endpoints from randomisation (week 20) to week 68*

Change in:

- Pulse (bpm)
- Amylase (U/L)
- Lipase (U/L)
- Calcitonin (ng/L)

#### **1.1.4 Type of trial**

This is a 68-week, randomised, double-blind, placebo-controlled, two-armed multi-centre, multinational withdrawal clinical trial<sup>1</sup> comparing once-weekly semaglutide s.c. 2.4 mg with semaglutide placebo in subjects with overweight or obesity.

#### **1.2 Scope of the statistical analysis plan**

This statistical analysis plan (SAP) is based on the updated protocol for trial NN9536-4376 “Effect and safety of semaglutide 2.4 mg once-weekly in subjects with overweight or obesity who have reached target dose during run-in period”, version 4.0 (04 September 2019) including amendment no. 3 (global), and includes more detailed procedures for executing the statistical analyses of the primary and secondary endpoints. Statistical analyses and a number of clarifications additional to

Statistical Analysis Plan  
 Trial ID: NN9536-4376  
 UTN: U1111-1201-0898  
 EudraCT No.: 2017-003473-34

~~CONFIDENTIAL~~

Date: 31 March 2020  
 Version: 1.0  
 Status: Final  
 Page: 9 of 24

**Novo Nordisk**

those specified in the trial protocol are pre-specified with this SAP. All changes to the statistical analyses planned in the trial protocol are documented in section [3](#).

## 2 Statistical considerations

### Taxonomy of week 68 assessments

For each subject a given assessment at week 68 may be available or missing and [Table 2-1](#) describes the taxonomy for this. Note, this is done per assessment and per subject; subjects may be a different type for different assessments (a subject may have “available on randomised treatment (AT)” for body weight but “missing on randomised treatment (MT)” for waist circumference).

**Table 2-1 Taxonomy for subjects based on week 68 assessments**

| Assessment at week 68 | Subjects on randomised treatment at week 68 | Type description                                                                                                                                                                                 | Type Abbreviation |
|-----------------------|---------------------------------------------|--------------------------------------------------------------------------------------------------------------------------------------------------------------------------------------------------|-------------------|
| Available             | Yes                                         | <b>Available on randomised treatment:</b><br>Subjects who complete the trial on randomised treatment with an assessment at week 68: Includes those that stop and restart trial product           | AT                |
|                       | No                                          | <b>Available but discontinued</b><br>Subjects who discontinued randomised treatment prematurely but returned to have an assessment at week 68. These are also called retrieved subjects          | AD                |
| Missing               | Yes                                         | <b>Missing on randomised treatment:</b><br>Subjects who complete the trial on randomised treatment without an assessment at week 68: Includes those that stop and restart trial product          | MT                |
|                       | No                                          | <b>Missing and discontinued:</b><br>Subjects who discontinued randomised treatment prematurely and did not return to have an assessment at week 68. These are also called non-retrieved subjects | MD                |

### 2.1 Sample size determination

The sample size and thereby the power for this trial is primarily defined to support safety. However, no formal statistical inference is planned based on number of adverse events. Given the trial sample size, the power of statistical tests for effect endpoints is described below.

The tests of superiority of semaglutide 2.4 mg to semaglutide placebo for the primary and confirmatory secondary endpoints are performed using the fixed-sequence statistical strategy. This strategy tests the endpoints using a predefined hierarchical order, all at the significance level of 5%, moving to test the next endpoint only after a statistically significant superiority result (p-value < 5%) on the previous endpoint. The test hierarchy is given in [Table 2-2](#) with underlying assumptions, marginal power and effective power. The effective power is calculated under the assumption of independence of endpoints by multiplying the respective marginal powers successively.

In the analysis approach addressing the primary estimand, week 68 assessments from retrieved subjects (AD) are used. These data are also used to impute missing measurements at week 68 for

Statistical Analysis Plan  
 Trial ID: NN9536-4376  
 UTN: U1111-1201-0898  
 EudraCT No.: 2017-003473-34

~~CONFIDENTIAL~~

Date: 31 March 2020  
 Version: 1.0  
 Status: Final  
 Page: 10 of 24

**Novo Nordisk**

non-retrieved subjects (MD). The imputation is done separately within each treatment arm (see description below). However, for the power calculations missing values (MT and MD), regardless of treatment arm, are assumed to be similar to semaglutide placebo subjects. These assumptions are likely conservative with respect to the power, and correspond to the jump to reference sensitivity analysis planned below.

### Assumptions

The common assumptions for the power calculations are

- The significance level is 5%
- The randomisation ratio is 2:1
- For continuous endpoints the t-test on the mean difference assuming equal variances is used
- Based on data from NN9536-4153
  - 5% of subjects discontinue permanently between randomisation (week 20) and week 68 and
  - 60% of these are retrieved (AD) at week 68
- All subjects in the semaglutide placebo arm are assumed to have same effect as subjects who complete the trial on semaglutide placebo (AT)
- Retrieved subjects (AD) in the semaglutide 2.4 mg arm are assumed to have an effect corresponding to half the treatment difference (compared to semaglutide placebo) of subjects who complete the trial on semaglutide 2.4 mg (AT)
- Non-retrieved subjects (MD) in the semaglutide 2.4 mg arm are assumed to have an effect corresponding to semaglutide placebo

Further assumptions made to calculate the power for each of the primary and confirmatory secondary endpoints are based on findings from other projects conducted by Novo Nordisk (NN8022 (SCALE), NN9535 (SUSTAIN), NN9924 (PIONEER)), and trial NN9536-4153 and are presented in [Table 2-2](#).

Given these assumptions, the sample size of 750 subjects (500 in the semaglutide 2.4 mg once weekly and 250 in the semaglutide placebo arm), gives an effective power (marginal powers multiplied) of 95% for the four endpoints in the hierarchical testing procedure. Under the additional assumption that minimum 80% of subjects will be eligible for randomisation a total of 900 subjects will be started on trial product. As sample size is primarily driven by safety, additional scenarios for assumptions are not included due to the overall high power.

Statistical Analysis Plan  
 Trial ID: NN9536-4376  
 UTN: U1111-1201-0898  
 EudraCT No.: 2017-003473-34

CONFIDENTIAL

Date: 31 March 2020  
 Version: 1.0  
 Status: Final  
 Page: 11 of 24  
 Novo Nordisk

**Table 2-2 Assumptions, marginal power and effective power for each endpoint in the hierarchical testing procedure given an anticipated number of 750 randomised subjects**

| Order | Endpoint              | Assumed mean ( $\pm$ SD) for completers |                     | Expected mean ( $\pm$ SD) Semaglutide 2.4 mg | Expected difference | Marginal power (%) | Effective power (%) |
|-------|-----------------------|-----------------------------------------|---------------------|----------------------------------------------|---------------------|--------------------|---------------------|
|       |                       | Semaglutide 2.4 mg                      | Semaglutide placebo |                                              |                     |                    |                     |
| 1     | % weight change       | -4 ( $\pm$ 10)                          | +5 ( $\pm$ 10)      | -3.7 ( $\pm$ 11)                             | 8.7 %-points        | > 99               | > 99                |
| 2     | WC change (cm)        | -3 ( $\pm$ 10)                          | +3 ( $\pm$ 10)      | -2.8 ( $\pm$ 11)                             | 5.8 cm              | > 99               | > 99                |
| 3     | sBP change (mmHg)     | -3.1 ( $\pm$ 13)                        | +1 ( $\pm$ 13)      | -3 ( $\pm$ 14)                               | 4 mmHg              | 95                 | 95                  |
| 4     | SF-36 PF score change | +6 ( $\pm$ 10)                          | +2 ( $\pm$ 10)      | +5.9 ( $\pm$ 11)                             | 3.9 score-points    | > 99               | 95                  |

SD = standard deviation; WC = waist circumference; sBP = systolic blood pressure; SF-36 = Short Form 36 v2.0 acute; PF = physical functioning

All tests in the hierarchy are based on the primary estimand

## 2.2 Definition of analysis sets

Two analysis sets are defined:

- The *full analysis set* (FAS) includes all randomised subjects according to the intention-to-treat principle. Subjects in the FAS will contribute to evaluation “as randomised”.
- The *safety analysis set* (SAS) includes all subjects exposed to at least one dose of trial product. Subjects in the SAS will contribute to evaluation “as treated”.

Any observation excluded from the analysis will be documented before database lock with the reason for exclusion provided.

Two observation periods are defined for each subject:

- In-trial: The *in-trial period* is defined as the uninterrupted time interval from date of week 0 to date of last contact with trial site.
- On-treatment (with trial product): A time-point is considered as ‘on-treatment’ if any dose of trial product has been administered within the prior 2 weeks (14 days). The *on-treatment period* is defined as all times which are considered on-treatment.
  - In general, the on-treatment period will therefore be from the date of first trial product administration to date of last trial product administration (+14 days) excluding potential off-treatment time intervals triggered by at least two consecutive missed doses.
  - For the evaluation of adverse events the lag time for each on-treatment time interval is 7 weeks (49 days) applicable to all subjects treated with trial product including those who are not eligible for randomisation.

The in-trial and on-treatment periods define the patient years of observation (PYO) and patient years of exposure (PYE), respectively, as the total time duration in the periods.

Statistical Analysis Plan  
 Trial ID: NN9536-4376  
 UTN: U1111-1201-0898  
 EudraCT No.: 2017-003473-34

~~CONFIDENTIAL~~

Date: 31 March 2020  
 Version: 1.0  
 Status: Final  
 Page: 12 of 24

**Novo Nordisk**

## 2.3 Statistical analyses

If necessary, a statistical analysis plan (SAP) may be written in addition to the protocol, including a more technical and detailed elaboration of the statistical analyses. The SAP will be finalised before database lock.

Effect endpoints will be analysed using the FAS; safety endpoints will be analysed using the SAS.

Results from statistical analyses will generally be accompanied by two-sided 95% confidence intervals and corresponding p-values. Superiority will be claimed if p-values are less than 5% and the estimated treatment contrasts favours semaglutide 2.4 mg.

### Handling of missing baseline data

The last available and eligible observation at or before randomisation is used as the baseline (randomisation) value. If no assessments are available during the run-in period, the mean of baseline (randomisation) values across all subjects is used as the baseline (randomisation) value. For endpoints evaluating the change from week 0, the last available and eligible observation at or before the week 0 visit is used as the baseline (week 0) value. If no assessments are available, the mean of baseline (week 0) values across all subjects is used as the baseline (week 0) value.

### 2.3.1 Primary endpoint

*Definition of primary endpoint: % weight change*

Change from baseline (randomisation/week 20) to week 68 in body weight (%) is defined as

$$\% \text{ weight change} = \frac{(\text{body weight at week 68} - \text{body weight at baseline})}{\text{body weight at baseline}} \times 100.$$

### Analyses addressing the primary estimand

The following statistical analysis and imputation methods are designed to address the primary estimand, i.e. to assess the effectiveness of semaglutide 2.4 mg.

The analysis model for % weight change is a linear regression (ANCOVA) of % weight change with randomised treatment as a factor and baseline body weight (kg) as covariate. The estimated treatment difference between semaglutide 2.4 mg and semaglutide placebo will be reported together with the associated two-sided 95% confidence interval (CI) and corresponding p-value.

The superiority tests of semaglutide 2.4 mg vs. semaglutide placebo will be carried out as follows.

Let  $\mu_{\text{semaglutide}}$  and  $\mu_{\text{semaglutide placebo}}$  denote the true mean of % weight change for semaglutide 2.4 mg and semaglutide placebo group, respectively. The null and alternative hypotheses tested are

Statistical Analysis Plan  
 Trial ID: NN9536-4376  
 UTN: U1111-1201-0898  
 EudraCT No.: 2017-003473-34

CONFIDENTIAL

Date: 31 March 2020  
 Version: 1.0  
 Status: Final  
 Page: 13 of 24

Novo Nordisk

$$H: \mu_{\text{semaglutide}} \geq \mu_{\text{semaglutide placebo}} \text{ vs}$$

$$H_A: \mu_{\text{semaglutide}} < \mu_{\text{semaglutide placebo}}$$

The hypothesis will be rejected and superiority claimed, if the upper limit of the estimated two-sided 95% CI is below 0.

#### *Handling of missing week 68 values for the primary estimand*

All available data at week 68 (AT and AD) are used and missing values (MT and MD) at week 68 will be imputed and the endpoint will be derived from the imputed values. Several approaches for imputation will be applied. First, a description of the primary imputation approach to address the primary estimand for the primary endpoint is given followed by a description of the sensitivity analyses used to assess the robustness of the primary analysis results. The sensitivity analyses investigate how assumptions on body weight development after discontinuation of randomised treatment impact the estimated treatment contrasts between semaglutide 2.4 mg and semaglutide placebo. An illustration of all imputation approaches for the primary estimand is given in [Figure 2-1](#).

#### *Primary imputation approach for the primary estimand*

*Multiple imputation approach using retrieved subjects (RD-MI):* The primary imputation approach for the primary estimand is a multiple imputation similar to the one described by McEvoy.<sup>2</sup> Missing body weight measurement at week 68 for non-retrieved subjects (MD) are imputed using assessments from retrieved subjects (AD) in each randomised treatment arm. This will be done according to the timing of last available observation on-treatment (LAO-OT) of body weight prior to week 68. Missing body weight measurements at week 68 for subjects on randomised treatment (MT) are imputed in a similar way by sampling from available measurements at week 68 from subjects on randomised treatment (AT) in the relevant randomised treatment arm. The multiple imputation approach is done in three steps:

- 1. Imputation:** Defines an imputation model using retrieved subjects (AD) from FAS and done within groups defined by randomised treatment. The model will be a linear regression of body weight (kg) at week 68 with gender (male/female), baseline BMI (kg/m<sup>2</sup>) (in categories  $\leq 35$ ,  $35 < 40$ ,  $\geq 40$ ) and timing of the LAO-OT of body weight as factors and baseline (randomisation) body weight (kg) and LAO-OT of body weight (kg) as covariates. No interactions will be included. The grouping of timing will be done by quarters (intervals of 12 weeks for endpoints evaluating the change from randomisation, intervals of 17 weeks for endpoints evaluating the change from week 0). If timing by quarters is too restrictive, halves (intervals of 24 weeks for endpoints evaluating the change from randomisation, intervals of 34 weeks for endpoints evaluating the change from week 0) or excluding timing will be used. The timing by quarters or halves is defined as too restrictive if the imputation model cannot be fit due to inadequate numbers of retrieved subjects in 1 or more groups. If the imputation model still cannot be fit after excluding timing then the model will be further reduced until the model can be fit.

Statistical Analysis Plan  
 Trial ID: NN9536-4376  
 UTN: U1111-1201-0898  
 EudraCT No.: 2017-003473-34

~~CONFIDENTIAL~~

Date: 31 March 2020  
 Version: 1.0  
 Status: Final  
 Page: 14 of 24

**Novo Nordisk**

Reduction will be done in a fixed order by first removing gender, then collapsing the two highest baseline BMI-groups into one ( $\geq 35$ ) and finally removing baseline BMI-groups. If no LAO-OT exists post-baseline then the LAO-OT will be the baseline body weight and the timing will be the first interval. If any subjects are MT, an imputation model for missing body weight measurements at week 68 for MT subjects will also be defined using AT subjects in a similar way. The estimated posterior distribution for the parameters (regression coefficients and variances) in the imputation models are then used to impute missing week 68 body weight values for each randomised treatment arm. This will be done 1,000 times and results in 1,000 complete data sets.

2. **Analysis:** Analysis of each of the 1,000 complete data sets, using the analysis model (ANCOVA) results in 1,000 estimations.
3. **Pooling:** Integrates the 1,000 estimation results into a final result using Rubin's formula.

Based on NN9536-4153 phase 2 results 1,000 copies should be sufficient to establish stable results. If 1,000 copies are insufficient, 10,000 copies will be used. The multiple imputations will be generated using Novo Nordisk trial number 95364376 as seed number. In addition to the seed number, it is specified that the dataset is sorted by subject ID.

#### *Sensitivity analyses*

*Jump to reference multiple imputation approach (J2R-MI):* Missing values of body weight at week 68 (MT and MD) for both the semaglutide 2.4 mg and semaglutide placebo group are imputed by sampling among all available assessments at week 68 in the semaglutide placebo group (AT and AD). This approach makes the assumption that subjects instantly after discontinuation lose any effect of randomised treatment beyond what can be expected from semaglutide placebo treatment as adjunct to reduced-calorie diet and increased physical activity.<sup>3</sup> The multiple imputation approach is done as above with the first step replaced by

1. **Imputation:** Defines an imputation model using semaglutide placebo subjects from FAS with a week 68 measurement (AT and AD). The model will be a linear regression of body weight (kg) at week 68 with gender (male/female), BMI ( $\text{kg}/\text{m}^2$ ) (in categories 27- $<35$ , 35- $<40$ ,  $\geq 40$ ) as factors and baseline (randomisation) body weight (kg) as covariate. No interactions will be included. If the imputation model cannot be fit due to inadequate numbers of retrieved subjects in 1 or more groups, then the imputation model will be reduced until the model can be fit. Reduction will be done in a fixed order by first removing gender, then collapsing the two highest baseline BMI-groups into one ( $\geq 35$ ) and finally removing baseline BMI-groups. The estimated posterior distribution for the parameters (regression coefficients and variances) in the imputation models are then used to impute missing week 68 body weight values for each randomised treatment arm. This will be done 1,000 times and results in 1,000 complete data sets.

Statistical Analysis Plan  
Trial ID: NN9536-4376  
UTN: U1111-1201-0898  
EudraCT No.: 2017-003473-34

~~CONFIDENTIAL~~

Date: 31 March 2020  
Version: 1.0  
Status: Final  
Page: 15 of 24

**Novo Nordisk**

The jump to reference approach is the basis for the sample size calculations.

*A single imputation approach as done by Sacks<sup>4</sup> (S1-SI and S2-SI):* Missing weight measurements at week 68 for non-retrieved subjects (MD) are imputed using a weight regain rate of 0.3 kg/month after LAO but truncated at no change from baseline whenever the extrapolation would lead to a positive weight gain relative to baseline. If a subject's weight at drug discontinuation represented a gain in weight relative to baseline, no additional gain will be imputed, and the unfavourable gain is carried forward to week 68. The weight regain imputation will be done for both randomised arms (S1-SI). Additionally, a version where only the semaglutide 2.4 mg arm uses the regain rate while the semaglutide placebo arm uses last available observation (corresponding to a weight regain rate of 0 kg/month) will be performed (S2-SI). For both versions, missing weight measurements at week 68 for subjects on randomised treatment (MT) are imputed by using LAO.

*Tippling-point multiple imputation analysis (TP-MI):* First, missing data are imputed according to the primary multiple imputation approach. Then, a penalty is added to the imputed values at week 68. The approach is to explore a range of penalties for both treatment groups, and the impact these would have on the study conclusions. The 2-dimensional space of penalties covering the range from -30% to 30% will be explored for both treatment groups. This sensitivity analysis evaluates the robustness of the superiority conclusions to departures from the observed change in body weight in both treatment groups.

*Mixed model for repeated measurements (MMRM):* This 'MMRM for effectiveness' will use all assessments regardless of adherence to randomised treatment, including assessments at week 68 for retrieved drop-outs (AD). The MMRM for effectiveness will be fitted using the same factor and covariate as for the primary analysis all nested within visit. An unstructured covariance matrix for measurements within the same subject will be employed, assuming that measurements for different subjects are independent.



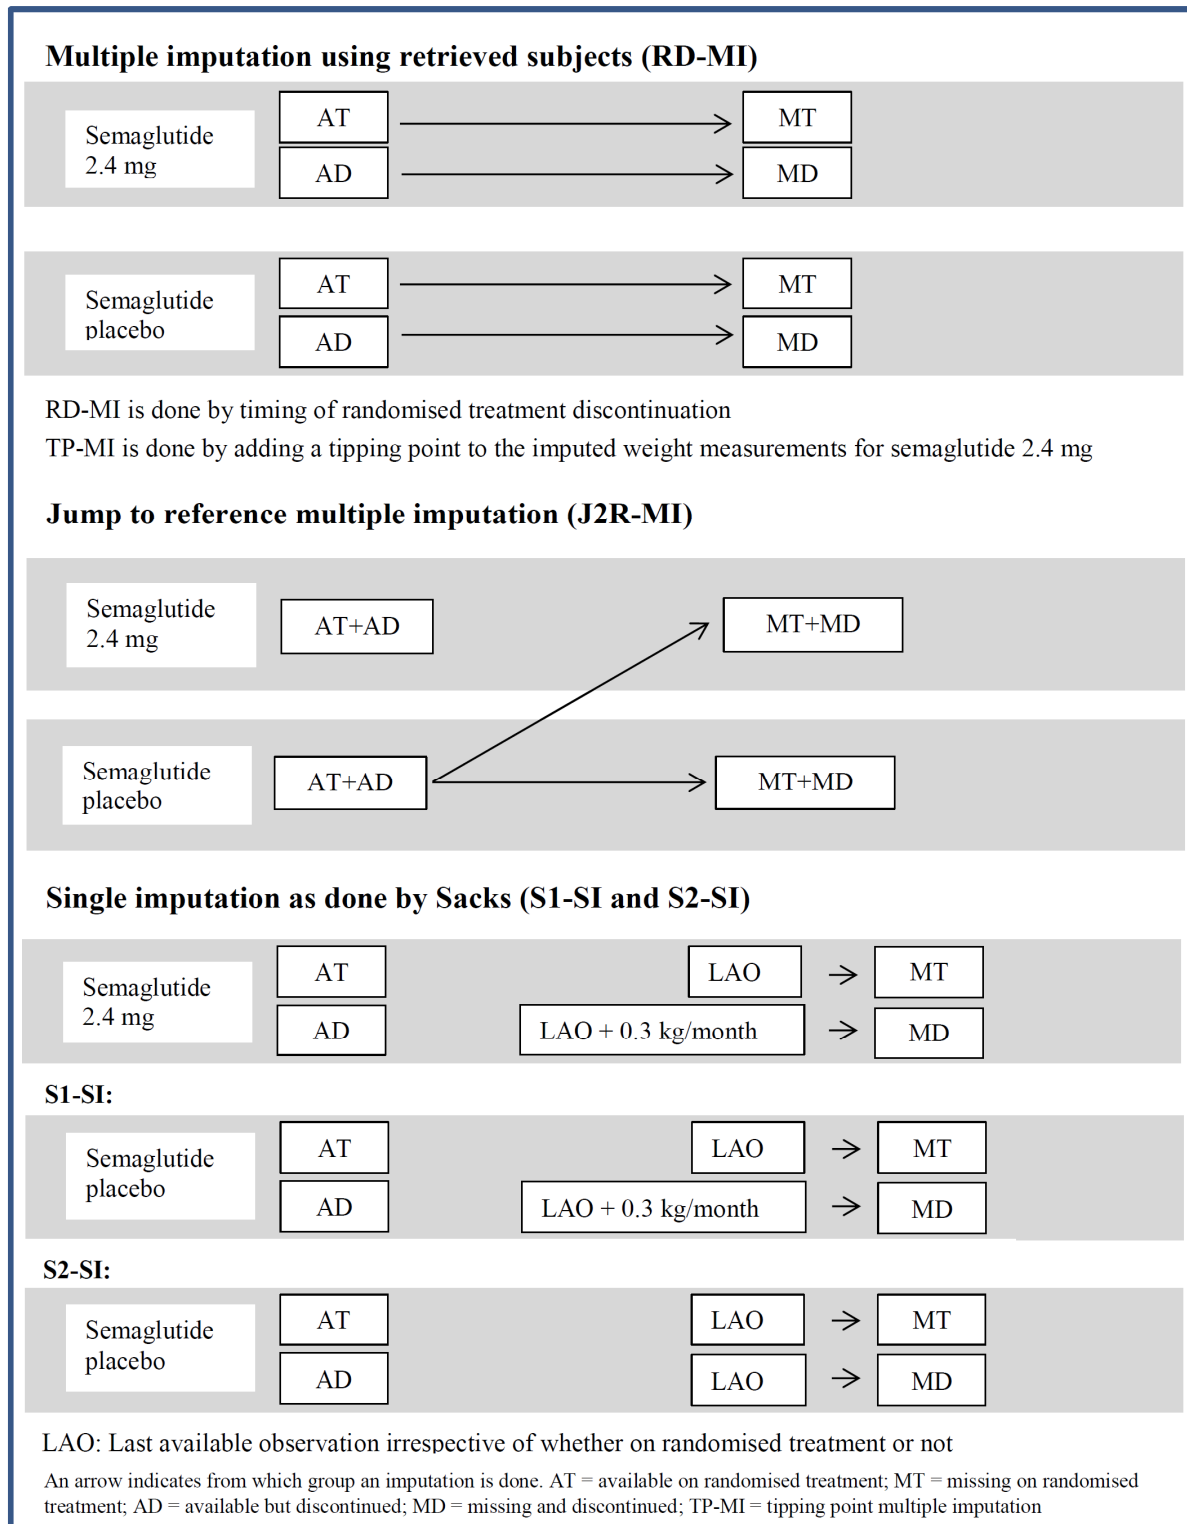

**Figure 2-1 Illustration of imputation approaches for the primary estimand**

Statistical Analysis Plan  
 Trial ID: NN9536-4376  
 UTN: U1111-1201-0898  
 EudraCT No.: 2017-003473-34

CONFIDENTIAL

Date: 31 March 2020  
 Version: 1.0  
 Status: Final  
 Page: 17 of 24

**Novo Nordisk**

### **Analysis addressing the secondary estimand**

The secondary estimand for % weight change addresses the efficacy of semaglutide 2.4 mg and will be assessed using a ‘MMRM for efficacy’. Week 68 assessments for retrieved drop-outs (AD) are not used in this analysis. The MMRM for efficacy will use assessments only from subjects who are taking the randomised treatment until end of treatment or until first discontinuing of randomised treatment. The derived date of the second consecutive missed dose will be used as the latest date for using assessments in this MMRM. The assessment closest in time and before the derived date of the second consecutive missed dose will be used as last assessment on randomised treatment. For subjects who initiate rescue interventions before completion or first discontinuing of randomised treatment, the date of starting weight management drugs or undergoing bariatric surgery will be used as latest date for using assessments in this MMRM. Similarly, the assessment closest in time and before the date of starting weight management drugs or undergoing bariatric surgery will be used as last assessment on randomised treatment. The MMRM for efficacy will be fitted using % weight change and the same factor and covariate as for the primary analysis all nested within visit. An unstructured covariance matrix for measurements within the same subject will be employed, assuming that measurements for different subjects are independent.

An overview of all analysis and imputation methods to address the primary and secondary estimands for the primary endpoint is given in [Table 2-3](#).

## **2.3.2 Secondary endpoints**

### **2.3.2.1 Confirmatory secondary endpoints**

Confirmatory secondary endpoints are listed in Section 4.2.2.1 in the protocol and are all included in the fixed-sequence statistical strategy, see above. All tests are tests of superiority of semaglutide 2.4 mg to semaglutide placebo.

#### **Analyses addressing the primary estimand**

All confirmatory secondary endpoints will be analysed using the same imputation approach as used for the primary endpoint and to address the primary estimand. The imputation model is the same as for the primary endpoint with body weight replaced by assessments of the endpoint to be analysed. The statistical model for continuous endpoints will be ANCOVA with factor and covariate as for the primary endpoint % weight change with baseline (randomisation) body weight replaced by the baseline (randomisation) assessment of the endpoint to be analysed.

#### **Analyses addressing the secondary estimand**

The confirmatory secondary endpoints will be analysed to address the secondary estimand using the same MMRM for efficacy described for the primary endpoint.

#### *Sensitivity analyses for confirmatory secondary endpoints*

For all continuous confirmatory secondary endpoints a sensitivity analysis using jump to reference as imputation approach will be carried out.

Statistical Analysis Plan  
 Trial ID: NN9536-4376  
 UTN: U1111-1201-0898  
 EudraCT No.: 2017-003473-34

**CONFIDENTIAL**

Date: 31 March 2020  
 Version: 1.0  
 Status: Final  
 Page: 18 of 24

**Novo Nordisk**

An overview of all analysis and imputation methods to address the primary and secondary estimands for confirmatory secondary endpoints is given in [Table 2-3](#).

**Table 2-3 Analysis and imputation methods to address the primary and secondary estimands for the primary and confirmatory secondary endpoints in the statistical testing hierarchy**

| Objective                                      | Endpoint              | Test order | Endpoint type | Estimand  | Analysis set | Statistical model | Imputation approach | Sensitivity analyses                      |
|------------------------------------------------|-----------------------|------------|---------------|-----------|--------------|-------------------|---------------------|-------------------------------------------|
| <b>Primary endpoint</b>                        |                       |            |               |           |              |                   |                     |                                           |
| <i>From randomisation (week 20) to week 68</i> |                       |            |               |           |              |                   |                     |                                           |
| Primary                                        | % weight change       | 1          | Continuous    | Primary   | FAS          | ANCOVA            | RD-MI               | J2R-MI<br>S1-SI<br>S2-SI<br>TP-MI<br>MMRM |
|                                                |                       |            |               | Secondary | FAS          | MMRM              | -                   | -                                         |
| <b>Confirmatory secondary endpoints</b>        |                       |            |               |           |              |                   |                     |                                           |
| <i>From randomisation (week 20) to week 68</i> |                       |            |               |           |              |                   |                     |                                           |
| Primary                                        | WC change (cm)        | 2          | Continuous    | Primary   | FAS          | ANCOVA            | RD-MI               | J2R-MI                                    |
|                                                |                       |            |               | Secondary | FAS          | MMRM              | -                   | -                                         |
| Secondary                                      | sBP change (mmHg)     | 3          | Continuous    | Primary   | FAS          | ANCOVA            | RD-MI               | J2R-MI                                    |
|                                                |                       |            |               | Secondary | FAS          | MMRM              | -                   | -                                         |
| Secondary                                      | SF-36 PF score change | 4          | Continuous    | Primary   | FAS          | ANCOVA            | RD-MI               | J2R-MI                                    |
|                                                |                       |            |               | Secondary | FAS          | MMRM              | -                   | -                                         |

FAS = full analysis set; ANCOVA = analysis of covariance; RD-MI = multiple imputation using retrieved subjects; J2R-MI = jump to reference multiple imputation; S1-SI and S2-SI = single imputation as done by Sacks; TP-MI = tipping point multiple imputation; MMRM = mixed model for repeated measurements; WC = waist circumference; sBP = systolic blood pressure; SF-36 = Short Form 36 v2.0 acute; PF = physical functioning;

Test order refers to the order of the endpoint in the statistical test hierarchy outlined in [Table 2-2](#)

### 2.3.2.2 Supportive secondary endpoints

Supportive secondary endpoints are listed in Section 4.2.2.2 in the protocol. All tests are tests of superiority of semaglutide 2.4 mg to semaglutide placebo.

#### Analyses addressing the primary estimand

The effect-related supportive secondary endpoints will be analysed using the same imputation approach as used for the primary endpoint and to address the primary estimand. The imputation model is the same as for the primary endpoint with body weight replaced by assessments of the endpoint to be analysed. The statistical model for continuous endpoints will be ANCOVA with factor and covariate as for the primary endpoint % weight change with baseline (randomisation) body weight replaced by the baseline (randomisation) assessment of the endpoint to be analysed.

The statistical model for responder endpoints relating to clinical outcome assessments will be logistic regression with randomised treatment as a factor and the baseline (randomisation) assessment of the endpoint to be analysed as covariate.

The supportive secondary endpoint subjects who gain weight from randomisation (week 20) to week 68 (yes/no) is used to describe weight maintenance. It will be analysed using logistic regression with randomised treatment as a factor and body weight (kg) at baseline (randomisation) as covariate.

Statistical Analysis Plan  
Trial ID: NN9536-4376  
UTN: U1111-1201-0898  
EudraCT No.: 2017-003473-34

~~CONFIDENTIAL~~

Date: 31 March 2020  
Version: 1.0  
Status: Final  
Page: 19 of 24

**Novo Nordisk**

For lipids and fasting serum insulin a multiplicative model will be used, i.e. the ratio between post randomisation measurements and baseline (randomisation) will be calculated instead of differences, and both the dependent variable and covariate will be log-transformed.

#### **Analyses addressing the secondary estimand**

The supportive secondary endpoints will be analysed to address the secondary estimand using the same MMRM for efficacy described for the primary endpoint.

The secondary estimand for weight gain responders will be assessed using the same MMRM for efficacy except that body weight (kg) will be used as response variable in the model. For subjects with missing body weight at week 68, individual values for body weight will be predicted from the MMRM and used to classify each subject as weight gain responder or not. This classification will then be analysed using a logistic regression model with randomised treatment as a factor and baseline (randomisation) body weight (kg) as covariate.

The secondary estimand for responder endpoints relating to clinical outcome assessments will be analysed using the same MMRM for efficacy as described for weight gain responders, where baseline (randomisation) body weight (kg) is replaced by baseline (randomisation) assessment of the endpoint to be analysed.

#### **Analyses addressing the tertiary estimand**

The effect-related supportive secondary endpoints addressing the tertiary estimand will be analysed using the same imputation approach as used for the primary endpoint, where baseline (randomisation) body weight (kg) is replaced by baseline (week 0) body weight (kg). The continuous endpoint on body weight will be analysed using ANCOVA with factor and covariate as for the primary endpoint % weight change with the baseline (randomisation) value replaced with baseline (week 0). The binary endpoints on body weight will be analysed using logistic regression with randomised treatment as a factor and baseline (week 0) assessment of body weight as covariate.

#### **Analyses addressing the quaternary estimand**

The effect-related supportive secondary endpoints addressing the quaternary estimand will be analysed using the same MMRM for efficacy described for the primary endpoint, where baseline (randomisation) body weight (kg) is replaced by baseline (week 0) body weight (kg).

The quaternary estimand for bw responders will be assessed using the same MMRM for efficacy described for the secondary estimand for the weight gain responders, where baseline (randomisation) body weight (kg) is replaced by baseline (week 0) body weight (kg).

#### *Sensitivity analyses for supportive secondary endpoints*

For supportive secondary endpoints no sensitivity analysis will be carried out.

Statistical Analysis Plan  
Trial ID: NN9536-4376  
UTN: U1111-1201-0898  
EudraCT No.: 2017-003473-34

~~CONFIDENTIAL~~

Date: 31 March 2020  
Version: 1.0  
Status: Final  
Page: 20 of 24

**Novo Nordisk**

### **Additional considerations for statistical analyses**

To evaluate the predictive value of short-term weight changes for long-term benefit of the use of semaglutide 2.4 mg, subjects will be categorised based on the weight change achieved in the run-in phase. If the weight change from week 0 to week 20 exceeds a certain pre-specified threshold subjects are classified as early “responders” whereas subjects are classified as early “non-responders” if the weight has changed less than the pre-specified threshold. Different thresholds of 3%, 4% and 5% will be investigated. These sub-group analyses will be done using the primary endpoint and the statistical model described for the primary endpoint. These analyses will be presented in a report separate from the Clinical Trial Report.

### **Analysis of safety endpoints**

The safety endpoint pulse from randomisation (week 20) to week 68 will be analysed using an MMRM for efficacy as described in Section [2.3.1](#). For pulse from week 0 to randomisation (week 20), amylase, lipase and calcitonin descriptive statistics will be provided. The analysis of calcitonin will be stratified by gender.

Adverse events will be defined as “treatment-emergent” (TEAE), if the onset of the event occurs in the on-treatment period (see definition in Section [2.2](#)). TEAEs and SAEs will be summarised by descriptive statistics, such as frequencies and rates. No formal statistical inference will be carried out based on the number of TEAEs and SAEs. All AEs will be coded using the most recent version of the Medical Dictionary for Regulatory Activities (MedDRA).

An overview of all analysis and imputation methods to address the primary, secondary, tertiary and quaternary estimands for supportive secondary endpoints is given in [Table 2-4](#).

Statistical Analysis Plan  
 Trial ID: NN9536-4376  
 UTN: U1111-1201-0898  
 EudraCT No.: 2017-003473-34

CONFIDENTIAL

Date: 31 March 2020  
 Version: 1.0  
 Status: Final  
 Page: 21 of 24

Novo Nordisk

**Table 2-4 Analysis and imputation methods to address the primary, secondary, tertiary and quaternary estimands for supportive secondary endpoints**

| Objective                                              | Endpoint                                       | Endpoint type | Estimand  | Analysis set | Statistical model | Imputation approach | Sensitivity analyses |
|--------------------------------------------------------|------------------------------------------------|---------------|-----------|--------------|-------------------|---------------------|----------------------|
| <b>Supportive secondary endpoints (effect related)</b> |                                                |               |           |              |                   |                     |                      |
| <i>From randomisation (week 20) to week 68</i>         |                                                |               |           |              |                   |                     |                      |
| Primary                                                | Weight change (kg)                             | Continuous    | Primary   | FAS          | ANCOVA            | RD-MI               | -                    |
|                                                        |                                                |               | Secondary | FAS          | MMRM              | -                   | -                    |
| Primary                                                | BMI change (kg/m <sup>2</sup> )                | Continuous    | Primary   | FAS          | ANCOVA            | RD-MI               | -                    |
|                                                        |                                                |               | Secondary | FAS          | MMRM              | -                   | -                    |
| Secondary                                              | HbA <sub>1c</sub> change (%; mmol/mol)         | Continuous    | Primary   | FAS          | ANCOVA            | RD-MI               | -                    |
|                                                        |                                                |               | Secondary | FAS          | MMRM              | -                   | -                    |
| Secondary                                              | FPG change (mg/dL, mmol/mol)                   | Continuous    | Primary   | FAS          | ANCOVA            | RD-MI               | -                    |
|                                                        |                                                |               | Secondary | FAS          | MMRM              | -                   | -                    |
| Secondary                                              | Fasting serum insulin change (mIU/L, pmol/mol) | Continuous    | Primary   | FAS          | ANCOVA            | RD-MI               | -                    |
|                                                        |                                                |               | Secondary | FAS          | MMRM              | -                   | -                    |
| Secondary                                              | dBP change (mmHg)                              | Continuous    | Primary   | FAS          | ANCOVA            | RD-MI               | -                    |
|                                                        |                                                |               | Secondary | FAS          | MMRM              | -                   | -                    |
| Secondary                                              | Total cholesterol change (mg/dL, mmol/mol)     | Continuous    | Primary   | FAS          | ANCOVA            | RD-MI               | -                    |
|                                                        |                                                |               | Secondary | FAS          | MMRM              | -                   | -                    |
| Secondary                                              | HDL change (mg/dL, mmol/mol)                   | Continuous    | Primary   | FAS          | ANCOVA            | RD-MI               | -                    |
|                                                        |                                                |               | Secondary | FAS          | MMRM              | -                   | -                    |
| Secondary                                              | LDL change (mg/dL, mmol/mol)                   | Continuous    | Primary   | FAS          | ANCOVA            | RD-MI               | -                    |
|                                                        |                                                |               | Secondary | FAS          | MMRM              | -                   | -                    |
| Secondary                                              | VLDL change (mg/dL, mmol/mol)                  | Continuous    | Primary   | FAS          | ANCOVA            | RD-MI               | -                    |
|                                                        |                                                |               | Secondary | FAS          | MMRM              | -                   | -                    |
| Secondary                                              | FFA change (mg/dL, mmol/mol)                   | Continuous    | Primary   | FAS          | ANCOVA            | RD-MI               | -                    |
|                                                        |                                                |               | Secondary | FAS          | MMRM              | -                   | -                    |
| Secondary                                              | Triglycerides change (mg/dL, mmol/mol)         | Continuous    | Primary   | FAS          | ANCOVA            | RD-MI               | -                    |
|                                                        |                                                |               | Secondary | FAS          | MMRM              | -                   | -                    |
| Secondary                                              | SF-36 PF score responders #                    | Binary        | Primary   | FAS          | LR                | RD-MI               | -                    |
|                                                        |                                                |               | Secondary | FAS          | LR                | MMRM                | -                    |
| Secondary                                              | SF-36 RP score change                          | Continuous    | Primary   | FAS          | ANCOVA            | RD-MI               | -                    |
|                                                        |                                                |               | Secondary | FAS          | MMRM              | -                   | -                    |
| Secondary                                              | SF-36 BP score change                          | Continuous    | Primary   | FAS          | ANCOVA            | RD-MI               | -                    |
|                                                        |                                                |               | Secondary | FAS          | MMRM              | -                   | -                    |
| Secondary                                              | SF-36 GH score change                          | Continuous    | Primary   | FAS          | ANCOVA            | RD-MI               | -                    |
|                                                        |                                                |               | Secondary | FAS          | MMRM              | -                   | -                    |
| Secondary                                              | SF-36 VT score change                          | Continuous    | Primary   | FAS          | ANCOVA            | RD-MI               | -                    |
|                                                        |                                                |               | Secondary | FAS          | MMRM              | -                   | -                    |
| Secondary                                              | SF-36 SF score change                          | Continuous    | Primary   | FAS          | ANCOVA            | RD-MI               | -                    |
|                                                        |                                                |               | Secondary | FAS          | MMRM              | -                   | -                    |
| Secondary                                              | SF-36 RE score change                          | Continuous    | Primary   | FAS          | ANCOVA            | RD-MI               | -                    |
|                                                        |                                                |               | Secondary | FAS          | MMRM              | -                   | -                    |
| Secondary                                              | SF-36 MH score change                          | Continuous    | Primary   | FAS          | ANCOVA            | RD-MI               | -                    |
|                                                        |                                                |               | Secondary | FAS          | MMRM              | -                   | -                    |
| Secondary                                              | SF-36 PCS score change                         | Continuous    | Primary   | FAS          | ANCOVA            | RD-MI               | -                    |
|                                                        |                                                |               | Secondary | FAS          | MMRM              | -                   | -                    |
| Secondary                                              | SF-36 MCS score change                         | Continuous    | Primary   | FAS          | ANCOVA            | RD-MI               | -                    |
|                                                        |                                                |               | Secondary | FAS          | MMRM              | -                   | -                    |
| Primary                                                | Proportion of subjects who gain weight (%)     | Binary        | Primary   | FAS          | LR                | RD-MI               | -                    |
|                                                        |                                                |               | Secondary | FAS          | LR                | MMRM                | -                    |

Statistical Analysis Plan  
 Trial ID: NN9536-4376  
 UTN: U1111-1201-0898  
 EudraCT No.: 2017-003473-34

**CONFIDENTIAL**

Date: 31 March 2020  
 Version: 1.0  
 Status: Final  
 Page: 22 of 24

**Novo Nordisk**

| <i>From week 0 to week 68</i>                          |                          |            |             |     |                        |       |   |
|--------------------------------------------------------|--------------------------|------------|-------------|-----|------------------------|-------|---|
| Secondary                                              | % weight change          | Continuous | Tertiary    | FAS | ANCOVA                 | RD-MI | - |
|                                                        |                          |            | Quarternary | FAS | MMRM                   | -     | - |
| Secondary                                              | Weight reduction <0%     | Binary     | Tertiary    | FAS | LR                     | RD-MI | - |
|                                                        |                          |            | Quarternary | FAS | LR                     | MMRM  | - |
| Secondary                                              | Weight reduction ≥5%     | Binary     | Tertiary    | FAS | LR                     | RD-MI | - |
|                                                        |                          |            | Quarternary | FAS | LR                     | MMRM  | - |
| Secondary                                              | Weight reduction ≥10%    | Binary     | Tertiary    | FAS | LR                     | RD-MI | - |
|                                                        |                          |            | Quarternary | FAS | LR                     | MMRM  | - |
| Secondary                                              | Weight reduction ≥15%    | Binary     | Tertiary    | FAS | LR                     | RD-MI | - |
|                                                        |                          |            | Quarternary | FAS | LR                     | MMRM  | - |
| Secondary                                              | Weight reduction ≥20%    | Binary     | Tertiary    | FAS | LR                     | RD-MI | - |
|                                                        |                          |            | Quarternary | FAS | LR                     | MMRM  | - |
| <b>Supportive secondary endpoints (safety related)</b> |                          |            |             |     |                        |       |   |
| <i>From week 0 to randomisation (week 20)</i>          |                          |            |             |     |                        |       |   |
| Secondary                                              | Number of TEAEs          | Continuous | -           | SAS | -                      | -     | - |
| Secondary                                              | Number of SAEs           | Continuous | -           | SAS | -                      | -     | - |
| Secondary                                              | Pulse change (bpm)       | Continuous | -           | SAS | Descriptive statistics | -     | - |
| Secondary                                              | Amylase change (U/L)     | Continuous | -           | SAS | Descriptive statistics | -     | - |
| Secondary                                              | Lipase change (U/L)      | Continuous | -           | SAS | Descriptive statistics | -     | - |
| Secondary                                              | Calcitonin change (ng/L) | Continuous | -           | SAS | Descriptive statistics | -     | - |
| <i>From randomisation (week 20) to week 68 / 75</i>    |                          |            |             |     |                        |       |   |
| Secondary                                              | Number of TEAEs          | Continuous | -           | SAS | -                      | -     | - |
| Secondary                                              | Number of SAEs           | Continuous | -           | SAS | -                      | -     | - |
| Secondary                                              | Pulse change (bpm)       | Continuous | -           | SAS | MMRM                   | -     | - |
| Secondary                                              | Amylase change (U/L)     | Continuous | -           | SAS | Descriptive statistics | -     | - |
| Secondary                                              | Lipase change (U/L)      | Continuous | -           | SAS | Descriptive statistics | -     | - |
| Secondary                                              | Calcitonin change (ng/L) | Continuous | -           | SAS | Descriptive statistics | -     | - |

FAS = full analysis set; ANCOVA = analysis of covariance; RD-MI = multiple imputation using retrieved subjects; MMRM = mixed model for repeated measurements; BMI = body mass index; HbA1c = Hemoglobin A1c; FPG = fasting plasma glucose; dBP = diastolic blood pressure; HDL = high density lipoprotein; LDL = low density lipoprotein; VLDL = very low density lipoprotein; FFA = free fatty acids; LR = logistic regression; SF-36 = Short Form 36 v2.0 acute; PF= Physical Functioning; RP = Role-Physical; BP = Bodily Pain; GH = General Health; VT = Vitality; SF = Social Functioning; RE = Role-Emotional; MH = Mental Health; PCS = Physical component summary; MCS = Mental component summary; TEAEs = treatment emergent adverse events; SAEs = serious adverse events; # responder value = 4.3

### 2.3.3 Exploratory endpoints

Exploratory endpoints are listed in Section 4.2.3 in the protocol. Observed data for exploratory endpoints will be summarised by descriptive statistics.

### 2.3.4 Other analyses

All collected data that were not defined as endpoints will be summarised by descriptive statistics.

## 2.4 Pharmacokinetic and/or pharmacodynamic modelling

Not applicable for this trial.

Statistical Analysis Plan  
 Trial ID: NN9536-4376  
 UTN: U1111-1201-0898  
 EudraCT No.: 2017-003473-34

~~CONFIDENTIAL~~

Date: 31 March 2020  
 Version: 1.0  
 Status: Final  
 Page: 23 of 24

**Novo Nordisk**

### 3 Changes to the statistical analyses planned in the protocol

The main analyses were described in the protocol for the trial NN9536-4376. However, clarifications and more detailed descriptions of endpoints and analyses are provided in this SAP. The changes from the protocol of NN9536-4376 are summarised below:

#### 3.1 Trial specific changes

- Quaternary estimand has been defined to account for analyses based on the hypothetical estimand for weight related endpoints from week 0 to week 68.
- Description of the MMRM for efficacy for weight gain responders has been added.
- It has been clarified that the safety endpoint pulse from week 0 to randomisation (week 20) will not be analysed but reported with descriptive statistics.
- It has been clarified that the “early responder” analyses will not be presented in the Clinical Trial Report, but in a separate report.

#### 3.2 Changes applied across STEP trials

- The supportive secondary endpoint “Body weight reduction  $\geq 20\%$  from baseline at week 0” was added.
- It was clarified that subjects in the FAS/SAS will be evaluated “as randomised”/“as treated”.
- In the text describing that “In general, the on-treatment period will therefore be from the date of first trial product administration to date of last trial product administration” the following has been added “(+14 days)” to emphasize that the lag-time after last trial product administration is included in the on-treatment period.
- All AEs will be coded using the most recent version of the Medical Dictionary for Regulatory Activities (MedDRA).
- The text explaining how to handle missing baseline values has been changed to make it clear that if no eligible observation at or before randomisation is available then the mean of baseline values across all subjects is used as baseline value.
- It is clarified that RD-MI imputation is performed according to the timing of last available observation *during the on-treatment period* (LAO-OT). This is true for all endpoints. This is to clarify that the grouping of subjects according to timing is as in McEvoy<sup>2</sup>. Furthermore it is clarified that the LAO-OT must be prior to the landmark visit (week 68)
- BMI group “27-<35” in the RD-MI imputation has been updated to “ $\leq 35$ ” to reflect that some subjects loose weight between screening and randomisation and therefore can have a BMI  $< 27 \text{ kg/m}^2$  at the randomisation visit.
- In grouping of retrieved subjects by timing of LAO-OT in the RD-MI procedure, it is clarified that timing by quarters or halves is defined as too restrictive if the imputation model cannot be fit due to inadequate numbers of retrieved subjects in 1 or more groups. Furthermore it is described how a model reduction will be performed if needed.



Statistical Analysis Plan  
 Trial ID: NN9536-4376  
 UTN: U1111-1201-0898  
 EudraCT No.: 2017-003473-34

~~CONFIDENTIAL~~

Date: 31 March 2020  
 Version: 1.0  
 Status: Final  
 Page: 24 of 24

**Novo Nordisk**

- It is clarified that if no post-baseline LAO-OT exist, then LAO-OT will be the baseline value and the timing of LAO-OT will be the first interval.
- In all multiple imputation procedures, in addition to the seed number, it is specified that the dataset is sorted by subject ID.
- The TP-MI procedure has been updated to be a 2-way tipping point analysis in which penalties are applied to both treatment groups (semaglutide 2.4 mg and placebo).
  - The rationale for the changed TP-MI procedure is as follows: *“To confirm the robustness of superiority conclusions using a tipping point analysis, we believe that a 2-way tipping point analysis represents the real-world situation for missing data from the both treatment arms (semaglutide and placebo). We would like to see departures from the treatment difference by varying both treatment arms rather than only adding a penalty to the active treatment arm (semaglutide). Additionally, please include interpretations for the varying scenarios and how likely they would be seen in a real-world setting.”* (from FDA response letter 17 May 2018).
- It is specified that fasting serum insulin will be log-transformed and analysed using a multiplicative model.
- It is specified that lipids, FPG and fasting serum insulin will also be analysed in SI-units.
- Text and tables have been updated to reflect that analyses for all non-weight related endpoints based on the secondary estimand and analyses for all weight related endpoints based on the quaternary estimand are to be done.

## 4 References

1. International Conference on Harmonisation. ICH Harmonised Tripartite Guideline. Topic E10: Choice of control group and related issues in clinical trials, 20 July 2000.
2. McEvoy BW. Missing data in clinical trials for weight management. *J Biopharm Stat.* 2016;26(1):30-6.
3. Carpenter JR, Roger JH, Kenward MG. Analysis of longitudinal trials with protocol deviation: a framework for relevant, accessible assumptions, and inference via multiple imputation. *J Biopharm Stat.* 2013;23(6):1352-71.
4. Sacks FM, Bray GA, Carey VJ, Smith SR, Ryan DH, Anton SD, et al. Comparison of weight-loss diets with different compositions of fat, protein, and carbohydrates. *N Engl J Med.* 2009;360(9):859-73.
