# Supplementary material
Source: PubMed Central journal article supplement (PMC7988425)
Supplement: jama-e213224-s004.pdf [file jama-e213224-s004.pdf]

## Supplementary Online Content 4

Rubino D, Abrahamsson N, Davies M, et al. Effect of Continued Weekly Subcutaneous Semaglutide vs Placebo on Weight Loss Maintenance in Adults with Overweight or Obesity: The STEP 4 Randomized Clinical Trial. *JAMA*. 2021. doi:10.1001/jama.2021.3224.

### Data Sharing Statement

Data will be shared with bona fide researchers submitting a research proposal approved by the independent review board. Access request proposals can be found at [novonordisk-trials.com](http://novonordisk-trials.com). Data will be made available after research completion, and approval of the product and product use in the European Union and the USA. Individual participant data will be shared in data sets in a de-identified/anonymized format.
