# Supplementary material
Source: PubMed Central journal article supplement (PMC7988425)
Supplement: jama-e213224-s005.pdf [file jama-e213224-s005.pdf]

| <b>Group Name: STEP 4 Investigators</b> |                  |                      |                  |                                                         |                                          |                                                         |                                                                                            |
|-----------------------------------------|------------------|----------------------|------------------|---------------------------------------------------------|------------------------------------------|---------------------------------------------------------|--------------------------------------------------------------------------------------------|
| First Name and Middle Initial(s)        | Last Name        | Suffix (eg, Jr, III) | Academic Degrees | Institution                                             | Location (city, state/province, country) | Role or Contribution, eg, chair, principal investigator | Group (if more than 1 Group listed in the byline) and/or Subgroup (eg, Steering Committee) |
| Mette                                   | Friberg          |                      |                  | Sjællands Universitetshospital                          | Køge, Denmark                            |                                                         |                                                                                            |
| Anders                                  | Sjödín           |                      |                  | Institut for Idræt og Ernæring                          | Copenhagen, Denmark                      |                                                         |                                                                                            |
| Dror                                    | Dicker           |                      |                  | Rabin Medical Center - Hasharon Hospital                | Petah-Tikva, Israel                      |                                                         |                                                                                            |
| Gabriella                               | Segal            |                      |                  | Endocrinology Clinic - Sheba Medical Center             | Tel-Hashomer, Israel                     |                                                         |                                                                                            |
| Ofri                                    | Mosenzon         |                      |                  | Diabetes Unit Hadassah Ein Karem MC                     | Jerusalem, Israel                        |                                                         |                                                                                            |
| Muhammad                                | Sabbah           |                      |                  | Linn Clinic - Clalit Health Services                    | Haifa, Israel                            |                                                         |                                                                                            |
| Yael                                    | Sofer            |                      |                  | Institute of Endocrinology, Metabolism and Hypertension | Tel Aviv, Israel                         |                                                         |                                                                                            |
| Victor                                  | Vishlitzky       |                      |                  | Clinical Research Unit Meir Medical Center              | Kefar Sava, Israel                       |                                                         |                                                                                            |
| Eelco W.                                | Meesters         |                      |                  | MC Slotervaart                                          | Amsterdam, the Netherlands               |                                                         |                                                                                            |
| Mirelle                                 | Serlie           |                      |                  | Academisch Medisch Centrum                              | Amsterdam, the Netherlands               |                                                         |                                                                                            |
| Arianne                                 | van Bon          |                      |                  | Rijnstate Ziekenhuis                                    | Arnhem, the Netherlands                  |                                                         |                                                                                            |
| Helena                                  | Cardoso          |                      |                  | Hospital de Santo António                               | Santo António, Portugal                  |                                                         |                                                                                            |
| Paula                                   | Freitas          |                      |                  | Centro Hospitalar de São João                           | Porto, Portugal                          |                                                         |                                                                                            |
| Pedro                                   | Carneiro de Melo |                      |                  | Unidade Local de Saúde de Matosinhos                    | Matosinhos, Portugal                     |                                                         |                                                                                            |
| Margarida                               | Monteiro         |                      |                  | Hospital de Braga                                       | Braga, Portugal                          |                                                         |                                                                                            |
| Mariana                                 | Monteiro         |                      |                  | Hospital da Luz Arrabida                                | Luz Arrabida, Portugal                   |                                                         |                                                                                            |
| Dírcea                                  | Rodrigues        |                      |                  | Centro Hospitalar e Universitário de Coimbra            | Coimbra, Portugal                        |                                                         |                                                                                            |
| Aysha                                   | Badat            |                      |                  | Wits Bara Clinical Trial Site                           | Johannesburg, South Africa               |                                                         |                                                                                            |
| Pankaj                                  | Joshi            |                      |                  | Diabetes Care Centre                                    | Pretoria, South Africa                   |                                                         |                                                                                            |

## Supplemental Online Content: Nonauthor Collaborators

| First Name and Middle Initial(s) | Last Name         | Suffix (eg, Jr, III) | Academic Degrees | Institution                                                  | Location (city, state/province, country) | Role or Contribution, eg, chair, principal investigator | Group (if more than 1 Group listed in the byline) and/or Subgroup (eg, Steering Committee) |
|----------------------------------|-------------------|----------------------|------------------|--------------------------------------------------------------|------------------------------------------|---------------------------------------------------------|--------------------------------------------------------------------------------------------|
| Gulam                            | Latiff            |                      |                  | Maxwell Centre                                               | Durban, South Africa                     |                                                         |                                                                                            |
| Essack A.                        | Mitha             |                      |                  | Newtown Clinical Research                                    | Johannesburg, South Africa               |                                                         |                                                                                            |
| Hans H.                          | Snyman            |                      |                  | Armansis Medical Centre                                      | Brits, South Africa                      |                                                         |                                                                                            |
| Elane                            | van Nieuwenhuizen |                      |                  | Synexus Watermeyer Clinical Research Centre                  | Pretoria, South Africa                   |                                                         |                                                                                            |
| Olga                             | González Albarrán |                      |                  | Hospital Gregorio Marañón                                    | Madrid, Spain                            |                                                         |                                                                                            |
| Assumpta                         | Caixas            |                      |                  | Corporació Sanitaria Parc Tauli                              | Barcelona, Spain                         |                                                         |                                                                                            |
| Carmen                           | de al Cuesta      |                      |                  | Clínica Nuevas Tecnologías en Diabetes y Endocrinología      | Seville, Spain                           |                                                         |                                                                                            |
| Pedro Pablo                      | Garcia Luna       |                      |                  | Hospital Virgen del Rocío                                    | Seville, Spain                           |                                                         |                                                                                            |
| Cristobal                        | Morales Portillo  |                      |                  | Hospital Virgen de la Macarena                               | Seville, Spain                           |                                                         |                                                                                            |
| Pedro                            | Mezquita Raya     |                      |                  | Centro Periférico de Especialidades Bola Azul                | Almeria, Spain                           |                                                         |                                                                                            |
| Miguel Angel                     | Rubio             |                      |                  | Hospital Clinico San Carlos                                  | Madrid, Spain                            |                                                         |                                                                                            |
| Niclas                           | Abrahamsson       |                      |                  | Akademiska sjukhuset Uppsala                                 | Uppsala, Sweden                          |                                                         |                                                                                            |
| Johan                            | Hoffstedt         |                      |                  | Karolinska Institutet                                        | Stockholm, Sweden                        |                                                         |                                                                                            |
| Fredrik                          | von Wowern        |                      |                  | Klinisk Forskningsenhet                                      | Malmö, Sweden                            |                                                         |                                                                                            |
| Erik                             | Uddman            |                      |                  | Endokrinologiska kliniken Malmö                              | Malmö, Sweden                            |                                                         |                                                                                            |
| Birgit                           | Bach-Kliegel      |                      |                  | Diabetes Adipositas Zentrum Zürich                           | Zollikerberg, Switzerland                |                                                         |                                                                                            |
| Felix                            | Beuschlein        |                      |                  | Klinik für Endokrinologie, Diabetologie, Klinische Ernährung | Zürich, Switzerland                      |                                                         |                                                                                            |
| Stefan                           | Bilz              |                      |                  | Kantonsspital St. Gallen                                     | St. Gallen, Switzerland                  |                                                         |                                                                                            |
| Alain                            | Golay             |                      |                  | Centre de Recherche Clinique HUG                             | Geneva, Switzerland                      |                                                         |                                                                                            |
| Gottfried                        | Rudofsky          |                      |                  | Kantonsspital Olten                                          | Olten, Switzerland                       |                                                         |                                                                                            |
| Christopher                      | Strey             |                      |                  | eSwiss Medical & Surgical Center                             | St. Gallen, Switzerland                  |                                                         |                                                                                            |
| Galyna                           | Fadieienko        |                      |                  | NI of Therapy na LT Malaya of NAMSU                          | Kharkiv, Ukraine                         |                                                         |                                                                                            |

## Supplemental Online Content: Nonauthor Collaborators

| First Name and Middle Initial(s) | Last Name   | Suffix (eg, Jr, III) | Academic Degrees | Institution                                                 | Location (city, state/province, country) | Role or Contribution, eg, chair, principal investigator | Group (if more than 1 Group listed in the byline) and/or Subgroup (eg, Steering Committee) |
|----------------------------------|-------------|----------------------|------------------|-------------------------------------------------------------|------------------------------------------|---------------------------------------------------------|--------------------------------------------------------------------------------------------|
| Nataliia                         | Kosei       |                      |                  | Institute of Pediatrics, Obstetrics and Gynecology of NAMSU | Kiev, Ukraine                            |                                                         |                                                                                            |
| Tetiana                          | Tatarchuk   |                      |                  | Verum Clinic LLC                                            | Kiev, Ukraine                            |                                                         |                                                                                            |
| Valentyna                        | Velychko    |                      |                  | Odesa Clinical Railway Hospital                             | Odesa, Ukraine                           |                                                         |                                                                                            |
| Olesya                           | Zynych      |                      |                  | Institute of Endocrinology and Metabolism of AMSU           | Kiev, Ukraine                            |                                                         |                                                                                            |
| Stephen L.                       | Aronoff     |                      |                  | Research Institute Of Dallas                                | Dallas, TX, USA                          |                                                         |                                                                                            |
| Harold E.                        | Bays        |                      |                  | L-MARC Research Center                                      | Louisville, KY, USA                      |                                                         |                                                                                            |
| Andrew P.                        | Brockmyre   |                      |                  | Holston Medical Group Pc                                    | Bristol, TN, USA                         |                                                         |                                                                                            |
| Robert S.                        | Call        |                      |                  | Clinical Research Partners LLC                              | Richmond, VA, USA                        |                                                         |                                                                                            |
| Charles                          | Crump       |                      |                  | Chattanooga Medical Research LLC                            | Chattanooga, TN, USA                     |                                                         |                                                                                            |
| Cyrus V.                         | Desouza     |                      |                  | University Of Nebraska Medical Center                       | Omaha, NE, USA                           |                                                         |                                                                                            |
| Valerie                          | Espinosa    |                      |                  | Texas Diabetes & Endocrinology                              | Austin, TX, USA                          |                                                         |                                                                                            |
| Almena L.                        | Free        |                      |                  | Pinnacle Research Group LLC                                 | Anniston, AL, USA                        |                                                         |                                                                                            |
| Winston H.                       | Gandy       |                      |                  | Ellipsis Group                                              | Atlanta, GA, USA                         |                                                         |                                                                                            |
| Steven A.                        | Geller      |                      |                  | Centennial Medical Group                                    | Elkridge, MD, USA                        |                                                         |                                                                                            |
| Gregory M.                       | Gottschlich |                      |                  | New Horizons Clinical Research                              | Cincinnati, OH, USA                      |                                                         |                                                                                            |
| Frank L.                         | Greenway    |                      |                  | Pennington Biomedical Research Center                       | Baton Rouge, LA, USA                     |                                                         |                                                                                            |
| Laurie                           | Han-Conrad  |                      |                  | Medical Center For Clinical Research LLC                    | San Diego, CA, USA                       |                                                         |                                                                                            |
| Wayne                            | Harper      |                      |                  | Wake Research Associates                                    | Raleigh, NC, USA                         |                                                         |                                                                                            |
| Lee                              | Herman      |                      |                  | Herman Clinical Research LLC                                | Suwanee, GA, USA                         |                                                         |                                                                                            |
| Mitzie                           | Hewitt      |                      |                  | Northern Pines Health Center PC                             | Buckley, MI, USA                         |                                                         |                                                                                            |
| Priscilla                        | Hollander   |                      |                  | Baylor Scott & White Endocrine Center Dallas                | Dallas, TX, USA                          |                                                         |                                                                                            |
| Steven R.                        | Kaster      |                      |                  | Wenatchee Valley Hospital and Clinics                       | Wenatchee, WA, USA                       |                                                         |                                                                                            |
| Anastasios                       | Manassis    |                      |                  | NYC Research Inc                                            | New York, NY, USA                        |                                                         |                                                                                            |

## Supplemental Online Content: Nonauthor Collaborators

| First Name and Middle Initial(s) | Last Name  | Suffix (eg, Jr, III) | Academic Degrees | Institution                                          | Location (city, state/province, country) | Role or Contribution, eg, chair, principal investigator | Group (if more than 1 Group listed in the byline) and/or Subgroup (eg, Steering Committee) |
|----------------------------------|------------|----------------------|------------------|------------------------------------------------------|------------------------------------------|---------------------------------------------------------|--------------------------------------------------------------------------------------------|
| Frederick A.                     | Martin     |                      |                  | PMG Research of Bristol LLC                          | Bristol, TN, USA                         |                                                         |                                                                                            |
| Robert E.                        | McNeill    |                      |                  | PMG Research of Salisbury LLC                        | Salisbury, NC, USA                       |                                                         |                                                                                            |
| Alexander V.                     | Murray     |                      |                  | PharmQuest                                           | Greensboro, NC, USA                      |                                                         |                                                                                            |
| Paul C.                          | Norwood    |                      |                  | Valley Research                                      | Fresno, CA, USA                          |                                                         |                                                                                            |
| John C.H.                        | Reed       |                      |                  | Endocrine Research Solutions Inc                     | Roswell, GA, USA                         |                                                         |                                                                                            |
| Julio                            | Rosenstock |                      |                  | Dallas Diabetes Research Center                      | Dallas, TX, USA                          |                                                         |                                                                                            |
| Domenica M.                      | Rubino     |                      |                  | Washington Center For Weight Management and Research | Arlington, VA, USA                       |                                                         |                                                                                            |
| Martin J.                        | Schear     |                      |                  | Dayton Clinical Research                             | Dayton, OH, USA                          |                                                         |                                                                                            |
| Mark L.                          | Warren     |                      |                  | Physician's East Endocrinology                       | Greenville, NC, USA                      |                                                         |                                                                                            |
